# Supplementary material for: Investigating the sequence landscape in the Drosophila initiator core promoter element using an enhanced MARZ algorithm
Source: PeerJ journal article supplement (doi:10.7717/peerj.15597), 2023-06-22

Type ID: 6  
Gapped n-mer model: **mmkm**

Type ID: 10  
Gapped n-mer model: **mkmkm**

Type ID: 20  
Gapped n-mer model: **mkmkkm**

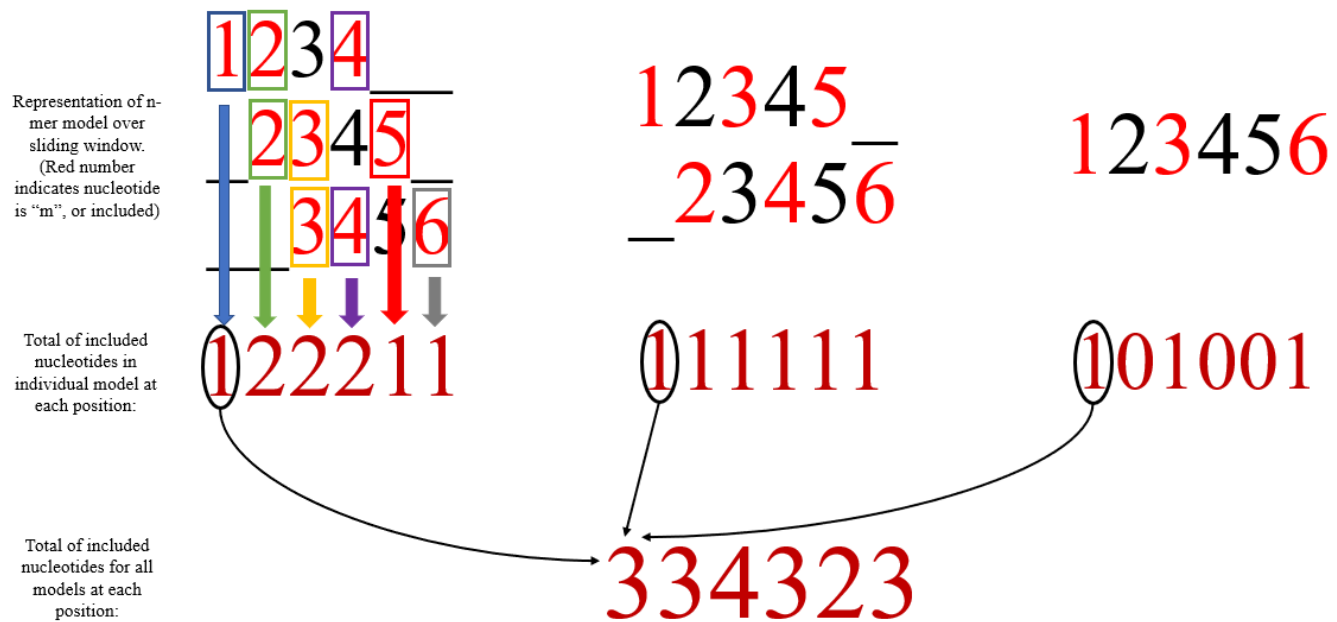

Supplement: Figure_S1.pdf [file Figure_S1.pdf]
