# Supplementary material for: Investigating the sequence landscape in the Drosophila initiator core promoter element using an enhanced MARZ algorithm
Source: PeerJ. 2023 Jun 22;11:e15597. doi: 10.7717/peerj.15597 (PMC10290830; doi:10.7717/peerj.15597)
Supplement: Supplemental Information 1 — The 86 annotated TATA CPE raw data sequences from the Drosophila Core Promoter Database (Kutach & Kadonaga, 2000) are shown, along with corresponding frequency, probability and position weight matrices. A +1 pseudocount is added to eliminate the appearance of a zero frequency at any position. [file peerj-11-15597-s001.xlsx]

## Sheet: TATA
Gene	Sequence			Position								Position
		1	2	3	4	5	6			1	2	3	4	5	6
44D	TATAAA	T	A	T	A	A	A		Position Frequency Matrix
74F	TATAGA	T	A	T	A	G	A		A	5	82	3	84	82	82
Act5c distal	AATAAA	A	A	T	A	A	A		C	6	1	1	2	1	2
Act79B	TTTAAA	T	T	T	A	A	A		G	3	1	1	2	3	5
Act87E	TATAAA	T	A	T	A	A	A		T	77	7	86	3	5	2
ald	AATAAA	A	A	T	A	A	A
Adh2 larval	TATAAA	T	A	T	A	A	A
andropin	TATAAA	T	A	T	A	A	A		Position Probability Matrix
Amy	TATAAG	T	A	T	A	A	G		A	0.0568182	0.931818	0.0340909	0.954545	0.931818	0.931818
ASC T4	CATAAA	C	A	T	A	A	A		C	0.0681818	0.0113636	0.0113636	0.0227273	0.0113636	0.0227273
ASC T5	TATAAA	T	A	T	A	A	A		G	0.0340909	0.0113636	0.0113636	0.0227273	0.0340909	0.0568182
ase	GATAAA	G	A	T	A	A	A		T	0.875	0.0795455	0.977273	0.0340909	0.0568182	0.0227273
bam	CATAAA	C	A	T	A	A	A
b1 Tubulin	TATAAA	T	A	T	A	A	A
Cc	TATATA	T	A	T	A	T	A		Position Weight Matrix
CecA1	TATAAA	T	A	T	A	A	A		A	-1.4816	1.31568	-1.99243	1.33977	1.31568	1.31568
CecA2	TATAAA	T	A	T	A	A	A		C	-1.29928	-3.09104	-3.09104	-2.3979	-3.09104	-2.3979
CecB	TATAAG	T	A	T	A	A	G		G	-1.99243	-3.09104	-3.09104	-2.3979	-1.99243	-1.4816
cs1 p1	TATCAA	T	A	T	C	A	A		T	1.25276	-1.14513	1.3633	-1.99243	-1.4816	-2.3979
cytb5	CATAAA	C	A	T	A	A	A
Ddc	TTTAAA	T	T	T	A	A	A
dpt	TATAAA	T	A	T	A	A	A
drosocin	TATAAA	T	A	T	A	A	A
eip28/29	TATAAA	T	A	T	A	A	A
E(sp1)m7	TATAAA	T	A	T	A	A	A
E(sp1)m8	TATAAA	T	A	T	A	A	A
fbp1	TATAAA	T	A	T	A	A	A
Fmrf	TATAAA	T	A	T	A	A	A
Gapdh2	TATATA	T	A	T	A	T	A
Gld	TTTAAA	T	T	T	A	A	A
hb (zyg)	TATAAA	T	A	T	A	A	A
hsc4	TATAAA	T	A	T	A	A	A
hsp22	TATAAA	T	A	T	A	A	A
hsp23	TATAAA	T	A	T	A	A	A
hsp26	TATAAA	T	A	T	A	A	A
hsp27	TATAAA	T	A	T	A	A	A
hsp67bhs	CATAAA	C	A	T	A	A	A
hsp67b	TATAAA	T	A	T	A	A	A
hsp83	TATAAA	T	A	T	A	A	A
hsp93	TATAAA	T	A	T	A	A	A
l (3) 73Ah	TTTAAA	T	T	T	A	A	A
lcp1	TATAAA	T	A	T	A	A	A
lcp2	TATAAA	T	A	T	A	A	A
lcp3	TATAAA	T	A	T	A	A	A
lcp4	TATAAA	T	A	T	A	A	A
lsp 1 alpha	TATAAG	T	A	T	A	A	G
lsp1 beta	TATAAA	T	A	T	A	A	A
lsp1 gamma	TATAAA	T	A	T	A	A	A
Mhc	TATAAA	T	A	T	A	A	A
Mp20	TTTAAA	T	T	T	A	A	A
Mtk	TATAAA	T	A	T	A	A	A
Mst26Aa	TATATA	T	A	T	A	T	A
Parp	TATAAT	T	A	T	A	A	T
PCNA	TAAAAA	T	A	A	A	A	A
period	TATAGA	T	A	T	A	G	A
pgd	TATATA	T	A	T	A	T	A
primase	GATAAA	G	A	T	A	A	A
Pros28.1 p2	TATTAA	T	A	T	T	A	A
rbp9 p3	CATAAA	C	A	T	A	A	A
Rh2	TATAAA	T	A	T	A	A	A
Rh3	TATAAA	T	A	T	A	A	A
Rh4	TATAAA	T	A	T	A	A	A
rhomboid	TATAAA	T	A	T	A	A	A
rotund	TATGAA	T	A	T	G	A	A
s15	TATAAA	T	A	T	A	A	A
s36	TATAAA	T	A	T	A	A	A
s38	TTTAAA	T	T	T	A	A	A
sca	AATAAA	A	A	T	A	A	A
sev p3	TAAAAA	T	A	A	A	A	A
Sgs-3	TATAAA	T	A	T	A	A	A
Sgs-4	TATAAA	T	A	T	A	A	A
Sgs-5	TATAAA	T	A	T	A	A	A
Sgs-7	TATAAA	T	A	T	A	A	A
Sgs-8	TATAAA	T	A	T	A	A	A
sryAC	TATAAA	T	A	T	A	A	A
sryB	AATAAA	A	A	T	A	A	A
su(wa)	TATAAC	T	A	T	A	A	C
ubiquitin	TATAAA	T	A	T	A	A	A
uro	TATAAA	T	A	T	A	A	A
Vm26Aa	TATAAA	T	A	T	A	A	A
Vm34Ca	TATAAA	T	A	T	A	A	A
yellow	TATAAA	T	A	T	A	A	A
Yp3	TATAAG	T	A	T	A	A	G
Act88F	TATAAA	T	A	T	A	A	A
ninaE	TATAAA	T	A	T	A	A	A
Pros28.1 p1	TATTAA	T	A	T	T	A	A
Act88F	TATAAA	T	A	T	A	A	A
