# Supplementary material for: Investigating the sequence landscape in the Drosophila initiator core promoter element using an enhanced MARZ algorithm
Source: PeerJ. 2023 Jun 22;11:e15597. doi: 10.7717/peerj.15597 (PMC10290830; doi:10.7717/peerj.15597)
Supplement: Supplemental Information 2 — The 205 annotated INR CPE raw data sequences from the Drosophila Core Promoter Database (Kutach & Kadonaga, 2000) are shown, along with corresponding frequency, probability and position weight matrices. A +1 pseudocount is added to eliminate the appearance of a zero frequency at any position. [file peerj-11-15597-s002.xlsx]

## Sheet: Sheet1
Gene	Sequence			Position								Position
		1	2	3	4	5	6			1	2	3	4	5	6
4f-rnp	TTATTT	T	T	A	T	T	T
44D	ACAAAA	A	C	A	A	A	A
44L	CCATTG	C	C	A	T	T	G		Position Frequency Matrix
74F	CTAGTT	C	T	A	G	T	T		A	48	13	169	20	36	51
Abdb	TCAGTG	T	C	A	G	T	G		C	31	124	8	28	43	56
abl p1	AAGAGA	A	A	G	A	G	A		G	35	22	22	93	13	27
abl p2	AGAGGC	A	G	A	G	G	C		T	95	50	10	68	117	75
ace JMB	GAGTGA	G	A	G	T	G	A
Act5c distal	TCACTA	T	C	A	C	T	A		Position Probability Matrix
Act5c proximal	ACTTTC	A	C	T	T	T	C		A	0.23301	0.0631068	0.820388	0.0970874	0.174757	0.247573
Act79B	TCACTC	T	C	A	C	T	C		C	0.150485	0.601942	0.038835	0.135922	0.208738	0.271845
Act87E	CCACTC	C	C	A	C	T	C		G	0.169903	0.106796	0.106796	0.451456	0.0631068	0.131068
Act88F	CCATTT	C	C	A	T	T	T		T	0.461165	0.242718	0.0485437	0.330097	0.567961	0.364078
ald	CCAGTG	C	C	A	G	T	G
Adh1 adult	CGATTA	C	G	A	T	T	A		Position Weight Matrix
Adh2 larval	CCAACA	C	C	A	A	C	A		A	-0.0703808	-1.37663	1.18832	-0.94585	-0.358063	-0.00975617
andropin	TCATCA	T	C	A	T	C	A		C	-0.507595	0.8787	-1.86214	-0.609377	-0.180382	0.0837699
Amy	CCAGAG	C	C	A	G	A	G		G	-0.386234	-0.850539	-0.850539	0.591018	-1.37663	-0.645745
Antp p1	TTAGTT	T	T	A	G	T	T		T	0.612295	-0.0295588	-1.639	0.277926	0.820592	0.375906
Antp p2	TCAGTT	T	C	A	G	T	T
arm E16	CCATAT	C	C	A	T	A	T
arm E9	TGATTC	T	G	A	T	T	C
ASC T4	CGAAGG	C	G	A	A	G	G
ASC T5	TCAGAA	T	C	A	G	A	A
ase	GCGAAA	G	C	G	A	A	A
bam	CCTGTT	C	C	T	G	T	T
b1 Tubulin	GAATGC	G	A	A	T	G	C
b3 Tubulin	TCAGTT	T	C	A	G	T	T
cad (maternal)	GTGCCC	G	T	G	C	C	C
cad	TCAGTA	T	C	A	G	T	A
Cc	ACATTA	A	C	A	T	T	A
CecA1	TCAGTC	T	C	A	G	T	C
CecA2	ACAGTC	A	C	A	G	T	C
CecB	TCATCA	T	C	A	T	C	A
Cf2	CTAGAG	C	T	A	G	A	G
cs1 p1	TCACTA	T	C	A	C	T	A
cs1 p2	ACAGAA	A	C	A	G	A	A
cTm	TCATTT	T	C	A	T	T	T
CycA p1	GCAATT	G	C	A	A	T	T
CycA p2	ACAGTG	A	C	A	G	T	G
cytb5	TCAGTT	T	C	A	G	T	T
Ddc	TCAGTT	T	C	A	G	T	T
Dfd	GCATAA	G	C	A	T	A	A
D-Ggamma1	TTGTCC	T	T	G	T	C	C
Dhfr	AAGCTT	A	A	G	C	T	T
dhod	ATAGTC	A	T	A	G	T	C
dna pol alpha	TCATCC	T	C	A	T	C	C
dpt	TCAGTC	T	C	A	G	T	C
drosocin	TCAAAT	T	C	A	A	A	T
E74A	TTAGTT	T	T	A	G	T	T
E74B p1a	TCAGTC	T	C	A	G	T	C
E74B p1b	TCAGTC	T	C	A	G	T	C
E74B p2	TTAGTT	T	T	A	G	T	T
E75A	TCATTG	T	C	A	T	T	G
E75B	TCATTC	T	C	A	T	T	C
EF alpha F1	TCACTT	T	C	A	C	T	T
EF-alpha F2	GTCTTT	G	T	C	T	T	T
eip28/29	GCATCA	G	C	A	T	C	A
ems	TCAGAC	T	C	A	G	A	C
engrailed	CTAATT	C	T	A	A	T	T
E(sp1)m7	ACATTT	A	C	A	T	T	T
E(sp1)m8	ATATCA	A	T	A	T	C	A
F	TGGATT	T	G	G	A	T	T
fbp1	GCAGTT	G	C	A	G	T	T
Fmrf	ACAGAA	A	C	A	G	A	A
Fsh	TCATTC	T	C	A	T	T	C
ftz	CGAGGG	C	G	A	G	G	G
G42	GCAGTC	G	C	A	G	T	C
G	ACAGTC	A	C	A	G	T	C
G6pd	TTATCT	T	T	A	T	C	T
Gapdh1	GCAGTC	G	C	A	G	T	C
Gapdh2	AAAGCT	A	A	A	G	C	T
gdlm	TCATAA	T	C	A	T	A	A
glass	TTAGTC	T	T	A	G	T	C
Gld	TGAGTC	T	G	A	G	T	C
Gdph	GTAGTC	G	T	A	G	T	C
Hairless p1	TTAGTT	T	T	A	G	T	T
Hairless p2	GCCGTG	G	C	C	G	T	G
hairy p1	AATCGT	A	A	T	C	G	T
hariy p2	TCATTC	T	C	A	T	T	C
hb (mat)	TCAGTT	T	C	A	G	T	T
hb (zyg)	TCAGTC	T	C	A	G	T	C
hedgehog	TTATAC	T	T	A	T	A	C
H2AvD	GTAGTC	G	T	A	G	T	C
histone H1	AGATGT	A	G	A	T	G	T
hsc3	AGAGTG	A	G	A	G	T	G
hsc4	CGGGTG	C	G	G	G	T	G
hsc5	AGGGCC	A	G	G	G	C	C
hsp22	TCAGTT	T	C	A	G	T	T
hsp23	TCAGTT	T	C	A	G	T	T
hsp26	ACAGAT	A	C	A	G	A	T
hsp27	ACAGTC	A	C	A	G	T	C
hsp67bhs	CAAGTC	C	A	A	G	T	C
hsp67b	TCATAC	T	C	A	T	A	C
hsp83	CGAGTC	C	G	A	G	T	C
hsp93	TCTCAA	T	C	T	C	A	A
htl p1	TCAGTT	T	C	A	G	T	T
htl p2	TACATC	T	A	C	A	T	C
I	TCATTA	T	C	A	T	T	A
janus	TCACAT	T	C	A	C	A	T
jockey	TCATTC	T	C	A	T	T	C
k10	ACACTC	A	C	A	C	T	C
l (3) 73Ah	ATATGG	A	T	A	T	G	G
labial	TCAGTC	T	C	A	G	T	C
lamin	CCAGGC	C	C	A	G	G	C
laminin b2	TCAGTT	T	C	A	G	T	T
lcp1	TTATCA	T	T	A	T	C	A
lcp2	TTATCA	T	T	A	T	C	A
lcp3	TCATCA	T	C	A	T	C	A
lcp4	GCATCA	G	C	A	T	C	A
lrr47	ATGGCT	A	T	G	G	C	T
lsp 1 alpha	ACAGTC	A	C	A	G	T	C
lsp1 beta	ACAGTC	A	C	A	G	T	C
lsp1 gamma	ACAACA	A	C	A	A	C	A
mex1	TCAGTT	T	C	A	G	T	T
Mhc	AGAACG	A	G	A	A	C	G
Mlc2	AAATCA	A	A	A	T	C	A
Mp20	TCAGTG	T	C	A	G	T	G
Mtk	ATTCCC	A	T	T	C	C	C
Mst26Aa	TTACTT	T	T	A	C	T	T
Mst26Ab	ACAGTC	A	C	A	G	T	C
ninaE	TTGCAG	T	T	G	C	A	G
not p2	GTAAAA	G	T	A	A	A	A
Parp	TTATTA	T	T	A	T	T	A
PCNA	TCATTC	T	C	A	T	T	C
period	CTAGTG	C	T	A	G	T	G
pgd	TCATTG	T	C	A	T	T	G
Pgk p1	ACATTG	A	C	A	T	T	G
Pgk p2	ACAGCA	A	C	A	G	C	A
Pgk p3	GCGGAA	G	C	G	G	A	A
Pp2A	AGAAAC	A	G	A	A	A	C
primase	TTAGTT	T	T	A	G	T	T
Pros28.1 p1	TCACAC	T	C	A	C	A	C
Pros28.1 p2	CGGCAT	C	G	G	C	A	T
Pros28.1 p3	AAGCAT	A	A	G	C	A	T
Pros35	ATAACT	A	T	A	A	C	T
ral1	GCATGT	G	C	A	T	G	T
ras2 p1	GTATTT	G	T	A	T	T	T
pas2 p2	TTCTCA	T	T	C	T	C	A
rbp9 p1	TTAGCA	T	T	A	G	C	A
rbp9 p2	ACACTT	A	C	A	C	T	T
rbp9 p3	TCAGTT	T	C	A	G	T	T
ref(2)p	TCATTA	T	C	A	T	T	A
Rh2	TGAGCC	T	G	A	G	C	C
Rh3	TCGTCT	T	C	G	T	C	T
Rh4	ACAGTT	A	C	A	G	T	T
rhomboid	TCAGTT	T	C	A	G	T	T
rotund	GCACTC	G	C	A	C	T	C
rp49	CCAGCT	C	C	A	G	C	T
rp215	AGATAT	A	G	A	T	A	T
RpS6 p1	GTCTTT	G	T	C	T	T	T
RpS6 p2	ACAGAC	A	C	A	G	A	C
RpS6 p3	TTCTTT	T	T	C	T	T	T
RpS17	GCATCC	G	C	A	T	C	C
rudimentary	GCAACT	G	C	A	A	C	T
s15	TCATAG	T	C	A	T	A	G
s36	CGAGCA	C	G	A	G	C	A
s38	GCAGAA	G	C	A	G	A	A
sca	TCAGTC	T	C	A	G	T	C
Scr	GCAGTC	G	C	A	G	T	C
SdhB	TCAGTT	T	C	A	G	T	T
sev p1	TCAGTT	T	C	A	G	T	T
sev p2	GTTAAA	G	T	T	A	A	A
sev p3	TCAGTT	T	C	A	G	T	T
Sgs-3	GTATCA	G	T	A	T	C	A
Sgs-4	GAATTC	G	A	A	T	T	C
Sgs-5	TATGGG	T	A	T	G	G	G
Sgs-7	TTGGTA	T	T	G	G	T	A
Sgs-8	ACGGTT	A	C	G	G	T	T
sina	CCATCT	C	C	A	T	C	T
sob	CGATTT	C	G	A	T	T	T
Sodh-1	TCAGTT	T	C	A	G	T	T
sodh-2	TCAAAG	T	C	A	A	A	G
Srp19	CTATTT	C	T	A	T	T	T
sryAC	TTAGTT	T	T	A	G	T	T
sryB	TTATCA	T	T	A	T	C	A
sryD	ACACAA	A	C	A	C	A	A
Ssrp2	ACATTT	A	C	A	T	T	T
Ste	TCATAT	T	C	A	T	A	T
su(s)	ACACCT	A	C	A	C	C	T
su(wa)	ATGTAC	A	T	G	T	A	C
Tbp	TTTGCC	T	T	T	G	C	C
Tf2b	GGGCAA	G	G	G	C	A	A
t11	CTATTA	C	T	A	T	T	A
TmI	TCAGTG	T	C	A	G	T	G
TmII	TCAGTT	T	C	A	G	T	T
TopoII	ATACTT	A	T	A	C	T	T
tra2	TCATTT	T	C	A	T	T	T
tra2s	TCACCT	T	C	A	C	C	T
trp	GCAGTG	G	C	A	G	T	G
Tub85d	TCAGTT	T	C	A	G	T	T
twist	TCAGTT	T	C	A	G	T	T
u170k	CTTCCG	C	T	T	C	C	G
ubiquitin	TTCAAA	T	T	C	A	A	A
ultrabithorax	GTGCCA	G	T	G	C	C	A
uro	TCACTA	T	C	A	C	T	A
vermilion	AGATCA	A	G	A	T	C	A
Vm26Aa	GCATCA	G	C	A	T	C	A
Vm34Ca	GCATCG	G	C	A	T	C	G
white	TCAGTT	T	C	A	G	T	T
windbeutel	CCAGTT	C	C	A	G	T	T
yellow	CCAGTC	C	C	A	G	T	C
Yp3	CCATCA	C	C	A	T	C	A
z600	TCAGTA	T	C	A	G	T	A
zeste	GTGTTT	G	T	G	T	T	T
