# Supplementary material for: Investigating the sequence landscape in the Drosophila initiator core promoter element using an enhanced MARZ algorithm
Source: PeerJ. 2023 Jun 22;11:e15597. doi: 10.7717/peerj.15597 (PMC10290830; doi:10.7717/peerj.15597)
Supplement: Supplemental Information 5 — The first column lists the Model Number for each gapped n-mer, the second column lists the corresponding m/k representation, and the third column lists the average Mean True Hit Ratio over the 50 trials. The remaining columns give the Mean True Hit Ratio values obtained from each of the 50 individual trials across all 64 models. [file peerj-11-15597-s005.xlsx]

## Sheet: Sheet1
Model #	k/m	Mean		Trial 0	Trial 1	Trial 2	Trial 3	Trial 4	Trial 5	Trial 6	Trial 7	Trial 8	Trial 9	Trial 10	Trial 11	Trial 12	Trial 13	Trial 14	Trial 15	Trial 16	Trial 17	Trial 18	Trial 19	Trial 20	Trial 21	Trial 22	Trial 23	Trial 24	Trial 25	Trial 26	Trial 27	Trial 28	Trial 29	Trial 30	Trial 31	Trial 32	Trial 33	Trial 34	Trial 35	Trial 36	Trial 37	Trial 38	Trial 39	Trial 40	Trial 41	Trial 42	Trial 43	Trial 44	Trial 45
0	kkkkkk	0.0337947		0	0.031946	0.011289	0.024234	0.031946	0.012945	0.046206	0.025549	0.046206	0.07044	0.0112892	0.0112892	0	0.0591512	0.012945	0	0.0255493	0.0255493	0.0112892	0.0206569	0.0336019	0.0704404	0.0319461	0.0255493	0.0336019	0.0368385	0.0591512	0.0574954	0.0255493	0.0368385	0.012945	0.0448911	0.0574954	0.0319461	0.0574954	0.0368385	0.0704404	0.0704404	0.0206569	0.0336019	0.0497835	0.0242342	0.0574954	0	0.0319461	0.0242342
1	kkkkkm	0.128124		0	0.0819798	0.0126088	0.0578636	0.0485971	0.0323843	0.221481	0.185492	0.202058	0.235094	0.0345189	0.138021	0.0153514	0.268254	0.0111408	0	0.202813	0.187311	0.0303598	0.0471243	0.0658918	0.258545	0.0827604	0.179269	0.0631246	0.22183	0.246512	0.2828	0.0142086	0.024865	0.021575	0.0599814	0.243769	0.0994132	0.289024	0.22183	0.251001	0.26602	0.109442	0.086381	0.215117	0.0517187	0.22227	0.0174563	0.0827604	0.0533215
2	kkkkmk	-0.0578602		0.0258505	-0.18046	-0.0388091	-0.0317818	-0.00902415	0.025698	0.0535818	-0.140593	-0.0480196	-0.089952	-0.196641	-0.196641	-0.180875	-0.0737175	0.00966924	-0.181624	0.13254	-0.145987	0.0377562	-0.152558	0.000414903	-0.148868	-0.144283	-0.0776173	0.0498921	-0.0832098	-0.0832098	0.13254	0.060324	0.120404	-0.196641	-0.181624	-0.124412	-0.215335	0.110965	-0.0993911	0.0855294	0.081484	0.0254356	-0.00902415	-0.148868	0.0132996	-0.148868	-0.0157663	-0.165858	-0.181624
3	kkkkmm	0.0969733		0.073448	0.184418	0.127104	0.286002	0.153064	0.0528475	-0.0681907	0.0688708	0.163295	-0.0164129	0.0844612	0.0844612	0.0994913	0.585943	0.0232753	0.177803	0.0508065	0.0633765	-0.149532	0.294184	0.0358827	0.190222	0.0108881	0.494359	-0.132125	0.0961531	0.278839	-0.0468588	0.0124471	0.0357224	0.196441	0.103469	0.19303	0.0907064	0.146909	0.065445	0.159378	-0.0412673	0.135238	0.0767524	0.186887	-0.141779	0.247149	-0.148234	0.0750469	0.0237883
4	kkkmkk	0.0144254		0	0.0122895	0	0	0.0122895	0	0.0290287	0.0167392	0.0290287	0.0290287	0	0	0	0.0290287	0	0	0.0167392	0.0167392	0	0.0122895	0.0122895	0.0290287	0.0122895	0.0167392	0.0122895	0.0167392	0.0290287	0.0290287	0.0167392	0.0167392	0	0.0122895	0.0290287	0.0122895	0.0290287	0.0167392	0.0290287	0.0290287	0.0122895	0.0122895	0.0167392	0	0.0290287	0	0.0122895	0
5	kkkmkm	0.0348842		0	0.0855644	0	0.0531591	0.067741	0	0.1179	0.021575	0.10931	0.133318	0	0	0	0.12931	0	0	0.021575	0.021575	0	0.0132996	0.0149365	0.0348746	0.0156593	0.021575	0.0156593	0.021575	0.0372342	0.0372342	0.0122895	0.0122895	0	0.0931252	0.0372342	0.0151699	0.0372342	0.119141	0.0367449	0.0367449	0.059516	0.0161812	0.021575	0	0.0356456	0	0.0156593	0
6	kkkmmk	0.0304705		0.0334988	0.0227113	0.011558	0.0248577	0.0222095	0.0373048	0.0202265	0.0202265	0.0986231	0.0315158	0.0112892	0.0112892	0.0112892	0.0728764	0.0220767	0.0222095	0.0537253	0.0316486	0.011422	0.0334988	0.011422	0.0315158	0.0222095	0.0601017	0.0222095	0.0537253	0.0537253	0.0537253	0.0424361	0.0429378	0.0112892	0.0222095	0.0316486	0.011422	0.0537253	0.0423033	0.0316486	0.031014	0.0220767	0.0222095	0.0315158	0.0112892	0.0315158	0	0.0222095	0.0222095
7	kkkmmm	0.125774		0.0271224	0.0190787	0.131342	0.0333178	0.0752502	-0.037378	0.0473057	-0.215143	0.118828	0.425397	-0.338334	-0.338926	0.596873	0.166121	0.673237	0.125782	0.0657443	-0.29071	0.0402765	0.141508	0.0391046	1.05724	1.13399	0.0512694	0.0296076	0.701305	0.049482	0.0637591	-0.0512122	0.201077	0.0305434	0.0923811	0.0259994	0.0733051	-0.374392	0.0760441	-0.391886	-0.303003	0.0381928	0.0797038	0.0490968	0.1703	-0.429341	-0.349301	0.673693	1.21199
8	kkmkkk	0.0154051		0.0248942	0.00439309	0.0248942	0.0292873	0.0248942	0.00439309	0.0248942	0.00439309	0.0292873	0.00439309	0.00439309	0.00439309	0.00439309	0	0	0.0292873	0	0.0292873	0.0248942	0.00439309	0.0248942	0.0292873	0.00439309	0.00439309	0.0248942	0.00439309	0.0292873	0.0248942	0.0248942	0.0248942	0.00439309	0.0292873	0.00439309	0.00439309	0.0248942	0.00439309	0	0	0	0.0248942	0.00439309	0	0.0292873	0.0248942	0.0292873	0.0292873
9	kkmkkm	0.0542315		0.0319422	0.0956446	0.023116	0.109935	0.118761	0.0121359	0.0977986	0.020962	0.035252	0.0835087	0.0121359	0.0121359	0.00882613	0.0121359	0	0.035252	0.020962	0.118761	0.0440781	0.0868185	0.118761	0.0440781	0.0956446	0.00882613	0.118761	0.0956446	0.106625	0.0319422	0.0132996	0.0132996	0	0.035252	0.020962	0.00882613	0.109935	0.0835087	0	0.00882613	0.0868185	0.0936808	0.00882613	0.00882613	0.118761	0.035252	0.0977986	0.106625
10	kkmkmk	0.0774817		0.0802218	0.0472904	0.0587277	0.113479	0.0553694	0.0526245	0.100942	0.0738809	0.0776051	0.0709244	0.0633344	0.0633344	0.0923839	0.0269087	0.0629369	0.100942	0.0831507	0.075304	0.108445	0.0974831	0.103475	0.0854223	0.0563144	0.0694057	0.132923	0.0789328	0.0872901	0.0867972	0.0670977	0.0953551	0.0848624	0.0960648	0.0891814	0.106179	0.0635232	0.0786045	0.0918782	0.0405657	0.109935	0.106279	0.0484104	0.0439431	0.0574522	0.0662328	0.0756796	0.0780486
11	kkmkmm	0.0968486		0.0852816	0.144697	0.0496758	0.371954	0.123142	0.0633208	0.110277	0.0824237	0.183011	0.127185	0.0848762	0.0855149	0.111457	0.074472	0.0533733	0.109958	0.0592841	0.0811557	0.0885332	0.0897476	0.111607	0.0746065	0.0498908	0.0775896	0.132075	0.0771153	0.0979108	0.0959231	0.0433232	0.0642151	0.0636513	0.191238	0.115512	0.104754	0.0638229	0.0999762	0.087248	0.0364116	0.178793	0.149893	0.0429313	0.0538636	0.0662866	0.0787131	0.0745577	0.0782672
12	kkmmkk	0.00914398		0.0134844	0.00380735	0.0134844	0.0172917	0.0134844	0.00380735	0.0134844	0.00380735	0.0172917	0.00380735	0.00380735	0.00380735	0.00380735	0	0	0.0172917	0	0.0172917	0.0134844	0.00380735	0.0134844	0.0172917	0.00380735	0.00380735	0.0134844	0.00380735	0.0172917	0.0134844	0.0134844	0.0134844	0.00380735	0.0172917	0.00380735	0.00380735	0.0134844	0.00380735	0	0	0	0.0134844	0.00380735	0	0.0172917	0.0134844	0.0172917	0.0172917
13	kkmmkm	0.06609		0.0301117	0.116382	-0.04678	0.0281854	0.0914003	0.0598687	0.0281854	-0.0194127	0.0431495	0.418366	0.0781296	0.0781296	0.00643651	0	0.0783644	-0.00827846	-0.038792	0.119053	0.0301117	0.0908555	0.0455224	0.0826345	0.0670239	0.0695406	0.0455224	0.120409	0.0455224	0.0301117	-0.0252095	0.127277	0	0.0641389	0.017337	0.017337	0.100861	0.138943	0.073132	0.0538398	0.0780952	0.0380305	0.0694348	-0.0500143	0.120861	0.0930753	0.125667	0.145286
14	kkmmmk	0.0518005		0.0344372	0.0323865	0.0474737	0.0770117	0.0445047	0.0369714	0.0567942	0.0342365	0.0697936	0.0477032	0.0447518	0.0447518	0.0679186	0	0.0441855	0.0567942	0.0571134	0.0449054	0.0682729	0.069751	0.0697687	0.058734	0.0344372	0.0585044	0.0805624	0.0589812	0.0556929	0.0563214	0.0449952	0.0681481	0.048176	0.0697687	0.0567591	0.0582612	0.0440319	0.0462011	0.0690487	0.0356858	0.0815389	0.0573606	0.0111595	0.0356858	0.0468452	0.0571311	0.0553099	0.0674281
15	kkmmmm	0.299651		0.412278	0.261293	0.257394	0.091431	0.289505	0.295377	0.290286	0.182407	0.292262	0.362707	0.264302	0.38313	0.300482	0.298698	0.196358	0.390527	0.179855	0.243697	0.420418	0.250919	0.374298	0.362579	0.370807	0.271582	0.473588	0.2475	0.489159	0.331302	0.252254	0.355142	0.21989	0.234688	0.223454	0.40571	0.379667	0.23673	0.468708	0.229036	0.329981	0.284851	0.218961	0.437159	0.295602	0.204413	0.481883	0.236399
16	kmkkkk	0.0205786		0	0.0261982	0.0107875	0.0107875	0.0261982	0	0.0299013	0.0144907	0.0299013	0.0406888	0.0107875	0.0107875	0	0.0299013	0	0	0.0144907	0.0144907	0.0107875	0.0154107	0.0154107	0.0406888	0.0261982	0.0144907	0.0154107	0.0252781	0.0299013	0.0406888	0.0144907	0.0252781	0	0.0261982	0.0406888	0.0261982	0.0406888	0.0252781	0.0406888	0.0406888	0.0154107	0.0154107	0.0252781	0.0107875	0.0406888	0	0.0261982	0.0107875
17	kmkkkm	0.00581663		0	-0.175274	0.0116973	0.0116973	0.126776	0	0.0202265	0	0.0485437	-0.197806	0.0116973	0.0116973	0	-0.17828	0	0	0	0	0.0116973	0.0164555	0.0202265	0.0281528	0.0353771	0	0.0202265	0.0116973	0.0202265	0.0353771	0	0.0101133	0	-0.102801	0.0353771	0.0319238	0.0303679	-0.030316	0.0319238	0.0319238	0.10523	0.0236798	0.0116973	0.0116973	0.0303679	0	0.0353771	0.0116973
18	kmkkmk	0.0236088		0.0255537	0.0255537	0.031386	0.031386	0.012945	0.0140706	0.028268	0.028268	0.070573	0.028268	0.0126088	0.0126088	0	0.0565024	0.0126088	0.0255537	0.041213	0.0286042	0.0255537	0.012945	0.0255537	0.0156593	0.0255537	0.021106	0.0255537	0.0286042	0.0286042	0.041213	0.0286042	0.041213	0.0126088	0.0255537	0.041213	0.012945	0.0286042	0.0156593	0.0286042	0.0156593	0	0.012945	0.0156593	0	0.0156593	0.0126088	0.012945	0.0255537
19	kmkkmm	0.2013		0.0372917	0.0459279	0.267802	0.0368331	0.0304042	0.0982931	0.0447952	0.571845	0.0600527	0.260618	0.498125	0.498125	0.544293	0.116242	0.188258	0.50306	0.208871	0.503165	0.0513578	0.0477686	0.0346444	0.455694	0.465111	0.0286689	0.0765394	0.550091	0.0371487	0.0630551	0.193187	0.201604	0.0317087	0.0938365	0.0444833	0.0592141	0.26076	0.0447549	0.247491	0.190539	0.0261065	0.0891598	0.0507612	0.116534	0.542588	0.12469	0.479854	0.48215
20	kmkmkk	0.00580292		0	0.0111595	0	0	0.0111595	0	0.0111595	0	0.0111595	0.0111595	0	0	0	0.0111595	0	0	0	0	0	0.0111595	0.0111595	0.0111595	0.0111595	0	0.0111595	0	0.0111595	0.0111595	0	0	0	0.0111595	0.0111595	0.0111595	0.0111595	0	0.0111595	0.0111595	0.0111595	0.0111595	0	0	0.0111595	0	0.0111595	0
21	kmkmkm	0.0751499		0.0438727	-0.0476003	-0.00813245	-0.111807	-0.0778056	-0.0566577	-0.243034	0.0181749	0.0429052	0.090689	0.00536394	0	-0.293557	-0.238617	-0.0324241	0.0438727	-0.0161812	-0.0704187	1.04859	0.0394466	0.968484	0.047553	0.0397518	0.00688563	1.16195	-0.091971	0.1993	0.227144	0.0142484	-0.117914	0.0159947	-0.137872	0.0406674	1.00451	0.0443858	-0.0533914	0.0466374	0.0294641	0.020253	0.0424897	-0.0937113	0.00688563	-0.054454	-0.00225156	0.0664512	0.0311409
22	kmkmmk	0.327629		0.160944	-0.063345	0.549288	0.177726	0.486068	0.0879071	0.0183116	0.103706	0.526126	0.584124	0.0799227	1.03816	0.550636	0.200001	1.04222	0.0962351	0.205092	-0.0786486	0.177052	0.615687	0.133471	0.0747019	0.211735	0.451919	0.602418	0.243339	1.08467	0.16971	0.295816	0.382337	0.485457	1.06019	0.200547	0.623368	-0.0415515	0.0719341	-0.03345	0.0974412	0.623233	0.493882	0.0032673	0.135817	0.563875	0.0758493	0.109619	0.272388
23	kmkmmm	0.285609		0.106059	0.146999	0.0951861	0.125463	0.0729737	0.118395	0.255487	-0.108896	0.119989	1.17901	-0.088695	1.20544	0.446022	0.0138618	0.323044	0.194128	0.112956	0.296509	0.0746335	0.146439	0.0714016	0.387169	0.800274	0.0914753	0.0273947	1.3025	0.242133	1.22442	0.252051	0.47213	0.101462	0.320345	0.201453	0.0526653	0.300927	0.314686	0.311272	0.0143671	0.147651	0.234228	0.0376603	0.220061	0.15353	0.476094	0.0956477	0.23049
24	kmmkkk	0.00691581		0.0132996	0	0.0132996	0.0132996	0.0132996	0	0.0132996	0	0.0132996	0	0	0	0	0	0	0.0132996	0	0.0132996	0.0132996	0	0.0132996	0.0132996	0	0	0.0132996	0	0.0132996	0.0132996	0.0132996	0.0132996	0	0.0132996	0	0	0.0132996	0	0	0	0	0.0132996	0	0	0.0132996	0.0132996	0.0132996	0.0132996
25	kmmkkm	0.205888		0.019162	0.0543206	0.550659	0.0438776	0.050265	0.103048	0.0214629	0.181192	0.0547329	0.0705512	0.119189	0.119189	0.583072	0.0112892	0.513423	0.614299	0.55162	0.166105	0.0304512	0.110781	0.050265	0.614037	0.178269	0.15556	0.050265	0.176801	0.0389757	0.019162	0.600258	0.0989856	0	0.0722333	0.0176766	0.00638733	0.614791	0.0554054	0.545554	0.0662646	0.0364932	0.0741106	0.157095	0.0166572	0.147757	0.595821	0.587941	0.589003
26	kmmkmk	0.0468917		0.0560754	0.0320481	0.0270635	0.0647689	0.0352519	0.0418255	0.0634459	0.0520452	0.043278	0.0448095	0.0426209	0.0426209	0.0561619	0.0156096	0.0316909	0.0634459	0.0672267	0.0422947	0.0784927	0.0565578	0.053354	0.056318	0.0458557	0.046358	0.0882797	0.053354	0.0527342	0.0624634	0.045616	0.0461819	0.056338	0.0453865	0.0427502	0.065229	0.0215776	0.032444	0.0426438	0.0215353	0.0774465	0.0665149	0.0314925	0.0237875	0.0453865	0.0332505	0.0322679	0.0434392
27	kmmkmm	0.322325		0.554353	0.339486	0.311087	0.375548	0.362011	0.213594	0.302218	0.193905	0.386197	0.285187	0.411021	0.442241	0.328329	0.336658	0.247643	0.497457	0.188552	0.20665	0.423486	0.19232	0.345079	0.43651	0.394393	0.236016	0.466988	0.259109	0.428278	0.2921	0.378897	0.373773	0.261356	0.0958296	0.283788	0.45581	0.439042	0.225614	0.527213	0.163632	0.405804	0.299966	0.222184	0.482056	0.296062	0.202987	0.535615	0.232164
28	kmmmkk	0.176626		0.0542549	0.0936545	0.156875	0.150341	0.114376	0.0717828	0.158093	0.243284	0.356606	0.212318	0.0709357	0.0975002	0.124409	0.0426411	0.173695	0.300299	0.122002	0.111742	0.193793	0.3441	0.316258	0.319098	0.106917	0.1619	0.335777	0.186599	0.263434	0.255927	0.136195	0.10743	0.138684	0.201042	0.159692	0.180068	0.150438	0.360457	0.11173	0.299214	0.325477	0.0970147	0.128912	0.0697523	0.202492	0.147565	0.144721	0.215074
29	kmmmkm	0.0312912		0.0767584	0.11751	0.10285	0.105029	0.110606	-0.682818	0.12808	0.125422	0.0611025	0.121835	0.0772436	0.0930313	0.444544	0.0571887	0.233589	0.143473	-0.697598	-0.748904	0.158927	0.12418	0.11812	-0.58428	0.269055	0.330568	0.191602	0.301073	0.167427	0.199961	0.214573	0.240146	0.0838162	0.130383	0.118667	0.1325	0.250414	0.0864764	0.155394	-0.679133	0.170287	0.149939	0.336421	0.145116	0.131273	-0.813706	0.285793	-0.614941
30	kmmmmk	0.428223		0.459437	0.497472	0.266314	0.349798	0.482614	0.187953	0.402427	0.398539	0.238878	0.531379	0.451741	0.44992	0.393663	0.393951	0.652509	0.418216	0.444491	0.445678	0.378788	0.471053	0.179954	0.368851	0.453812	0.48007	0.422297	0.396357	0.444375	0.453803	0.410682	0.461324	0.383646	0.473946	0.375103	0.433464	0.416001	0.497685	0.580801	0.473301	0.519593	0.506425	0.429729	0.47938	0.448001	0.490564	0.532763	0.363478
31	kmmmmm	0.510413		0.470086	0.625848	0.508998	0.375304	0.601181	0.394034	0.421248	0.453444	0.406736	0.646295	0.619605	0.527202	0.494134	0.438091	0.661248	0.455185	0.500441	0.491401	0.478651	0.626259	0.461298	0.501076	0.562422	0.510252	0.424536	0.546673	0.475497	0.475542	0.475297	0.59795	0.538775	0.572098	0.504921	0.417438	0.496012	0.531905	0.565509	0.484698	0.491673	0.524246	0.564496	0.525694	0.480088	0.526531	0.502719	0.618792
32	mkkkkk	0.072145		0.0597124	0.0774403	0.0453197	0.0626375	0.0621681	0.0734601	0.116098	0.0636895	0.0566343	0.0919422	0.011558	0.011558	-0.00830937	0.140022	0.0331026	0.0311573	0.0739729	0.0453069	0.0145838	0.0448761	0.066441	0.136744	0.0542125	0.073862	0.0849573	0.0642756	0.122795	0.120356	0.0586114	0.0639949	0.0333246	0.0707117	0.09152	0.0921656	0.0868556	0.0774692	0.113627	0.123969	0.0714902	0.0385494	0.187874	0.04591	0.106513	0.0439652	0.0669871	0.0626375
33	mkkkkm	0.0718904		0.0422384	0.0383738	0.0395223	0.0426994	0.0669887	0.0702609	0.0931344	0.0834562	0.061616	0.0786061	0.0317398	0.0317398	0.0392318	0.110227	0.0508848	0.0616558	0.0694239	0.0722988	0.0357276	0.0648567	0.0468056	0.111017	0.090745	0.0663057	0.066683	0.0690135	0.124671	0.108159	0.0266999	0.0519781	0.0356927	0.0606857	0.123694	0.0996371	0.0828217	0.0786797	0.132243	0.102557	0.0239285	0.104843	0.168179	0.0576441	0.0928912	0.0163112	0.0772475	0.0741029
34	mkkkmk	0.108896		0.185953	0.194458	0.354639	0.0243121	-0.0275698	-0.104068	0.148328	0.0865836	0.141414	0.180144	0.0727299	0.0727299	-0.0434218	-0.0582995	0.184342	0.150626	0.0910323	0.153544	0.139675	0.172324	0.111622	0.120322	0.146922	-0.0357759	0.144004	0.160775	0.0726411	0.0963962	0.0702502	0.104441	0.208098	0.150626	0.104902	0.0124471	0.0722529	0.133053	0.145039	0.218141	0.0514944	0.180009	-0.0427539	0.211808	0.189674	0.178721	0.165241	0.0303045
35	mkkkmm	0.0698784		0.156424	-0.0908998	0.127683	-0.16645	0.0568205	0.0899785	-0.0989569	0.157531	0.533811	0.114485	0.0502385	0.0504103	0.0677767	0.0373413	0.0372229	0.0322654	0.167477	0.0187149	0.0188344	0.0398209	0.172489	0	0.0180033	-0.169606	0.0314344	0.138696	0.170962	0.177806	0.0307702	0.0474371	0.120154	0.0424742	0.167477	0.0111595	0.146371	0.0282291	0.0288874	0.18869	0.0414972	-0.0241079	0.0596522	0.16742	0.0389404	0.0388042	0.0391093	0.021106
36	mkkmkk	0.0113754		0.0291203	0.000701625	0.0110327	0.021227	-0.0131646	0.0291203	0.0111411	0.0104395	0	-0.00753964	0	0	0.0136817	0.0291203	0.0622581	0.021227	0.000701625	0	0.000701625	0.0107875	0.019036	0.0186808	0.0104395	0.00789328	0.0183328	-0.00719166	0.0291203	0.0111411	0.0107875	0.0107875	0.00527727	0.0107875	0.021227	0.0183328	-0.00753964	0.0107875	0.021227	0.00789328	0.000353642	0	0.033234	0.0107875	-0.0100859	-0.0100859	0.021227	0.021227
37	mkkmkm	0.0215194		0.0209367	-0.0044989	-0.00135243	0.0173878	0.0484991	0.0547796	0.0194551	0.0672396	0.00536394	0.0200838	-0.188838	-0.00228112	0.348636	0.0422454	0.0399247	-0.0953837	-0.146944	-0.0325234	-0.00972938	-0.15164	0.0602749	0.0732814	0.102891	-0.135062	0.0285763	-0.0882088	0.0338816	0.0136551	-0.0939776	0.197762	0.00544059	0.0242114	0.0209367	0.0285763	-0.142036	0.0188475	0.0296706	0.130469	0.00972887	0.0185761	0.420813	0.105639	-0.165638	0.347762	-0.156211	-0.0910938
38	mkkmmk	0.0438787		0.0558178	0.062825	0.0206431	0.0511296	0.0433519	0.122693	0.0365614	0.0385532	0.0285545	0.0562511	0.0319793	0.0319793	0.0319461	0.0949536	0.128724	0.0242718	0.0265671	0.0505355	0.0385494	0.0505355	0.0391716	0.0242718	0.0555143	0.0949536	0.0292507	0.0365614	0.0242756	0.0315459	0.0172684	0.0385532	0.0428437	0.0242718	0.0385532	0	0.0265671	0.0435282	0.0435282	0.0678039	0.0312425	0.0535263	0.0487552	0.0678039	0.0555143	0.0435282	0.0555143	0
39	mkkmmm	0.192406		0.379743	0.215473	0.383023	0.0166701	0.0459034	0.0805384	0.237182	0.244824	0.191799	0.326115	0.368587	0.199182	0.371068	0.161228	0.137733	0.126666	0.165776	0.140713	0.254361	0.0909771	0.0568652	0.0208033	0.196183	0.230802	0.164632	0.115545	0.117211	0.236399	0.196025	0.273993	0.162924	0.127753	0.0753051	0.0956361	0.121965	0.163302	0.137001	0.270743	0.199861	0.145537	0.229425	0.184394	0.239306	0.285927	0.361009	0.188676
40	mkmkkk	0.0283713		0.0134844	0.0459542	0.0647249	0.0470118	1.03477e-16	0.0190367	0.0426935	0.0236568	0.027975	0.0516318	0.027975	0.027975	1.03477e-16	0.0336526	0.00741125	0.0561779	0.0179791	0.0190367	0.0426935	0.0201683	0.0649909	0.0381987	0.00567762	0.019162	0.0324698	0.0526894	0.0426935	0.019162	0.0179791	0.0144907	0.0107673	0.0459542	0.0370159	0.0179791	0.00567762	0.0144907	0.027975	0.0381987	0.0505002	0.027975	0.0381987	0.0649909	0.0335274	0	0.0144907	0.0201683
41	mkmkkm	0.0394429		0.00571102	0.0395597	0.0490536	0.0183536	0.152423	0.0147102	0.0356124	0.0299013	0.072317	0.135244	0.027319	0.027319	0.0752934	0.0475886	0.00564462	0.0446116	0.0154107	0	0.0299013	0.032777	0.0427297	0.0348785	0.0292009	0.0144907	0.0427297	0.0475544	0.0446116	0.0292009	0.0119861	0.011422	0.0832518	0.0634187	0.0154107	0.0358319	0.0292009	0.0945579	0.0126088	0.0292009	0.0631251	0.029585	0.0348785	0.0427297	0.0329966	0.0147102	0.0183536	0.0270994
42	mkmkmk	0.142857		0.144846	0.151031	0.18352	0.125556	0.188665	0.172394	0.13858	0.13585	0.159651	0.138979	0.118586	0.118586	0.198081	0.128621	0.152969	0.146219	0.128695	0.0928635	0.166853	0.116168	0.113395	0.162229	0.146151	0.135215	0.12575	0.114646	0.115777	0.133851	0.122422	0.165767	0.270851	0.129441	0.0961101	0.133355	0.148917	0.132823	0.112211	0.152109	0.135015	0.150451	0.130281	0.154527	0.14598	0.173523	0.14138	0.135942
43	mkmkmm	0.361755		0.401483	0.391375	0.469348	0.279786	0.37281	0.390599	0.25492	0.423786	0.362383	0.460537	0.320746	0.322314	0.358983	0.277051	0.490979	0.436758	0.368913	0.381495	0.255758	0.45301	0.232288	0.29051	0.401015	0.287974	0.267731	0.317274	0.266887	0.285428	0.42472	0.214967	0.316894	0.346137	0.226631	0.25801	0.344202	0.296602	0.402146	0.40435	0.345778	0.508936	0.516516	0.407308	0.375575	0.456122	0.402439	0.346467
44	mkmmkk	0.0149368		0	0.0257467	0.0492342	0.0124471	0.0492342	0	0.0247217	0.0247217	0.0124471	0.0371688	0.0124471	0.0124471	0.0492342	0.0238691	0.0062637	0.0247217	0.0132996	0	0.0247217	0.0238691	0.0257467	0.011422	0.011422	0.011422	0.0257467	0.0238691	0.0247217	0.011422	0.0132996	0.0124471	-0.165771	0.0257467	0.0132996	0.0132996	0.011422	0.0124471	0.0124471	0.011422	0.0132996	0.0124471	0.011422	0.0257467	0.0124471	0	0.0124471	0.0238691
45	mkmmkm	0.217777		0.431869	0.293326	0.364328	0.011558	0.0682966	0.151725	0.164452	0.218697	0.13107	0.251757	0.286744	0.152424	0.283435	0.231104	0.109987	0.168409	0.126735	0.0936457	0.169277	0.146775	0.251034	0.280041	0.173486	0.166569	0.372819	0.164664	0.370574	0.187582	0.137539	0.361588	0.316427	0.154902	0.140808	0.323372	0.332833	0.207734	0.0939861	0.12674	0.231761	0.128302	0.167459	0.161459	0.216067	0.156886	0.345256	0.289884
46	mkmmmk	0.499227		0.549482	0.55814	0.5646	0.448253	0.592512	0.441222	0.48721	0.601439	0.4492	0.568868	0.522842	0.415956	0.467951	0.356535	0.603134	0.655186	0.462997	0.47143	0.526756	0.590063	0.70445	0.339513	0.557095	0.467446	0.391809	0.530929	0.455072	0.406737	0.498257	0.604006	0.468208	0.453859	0.33254	0.510525	0.448761	0.415504	0.51643	0.584643	0.488801	0.428364	0.523939	0.448698	0.39651	0.645129	0.587517	0.537286
47	mkmmmm	0.482799		0.557128	0.52504	0.428046	0.429965	0.389553	0.413634	0.335349	0.438657	0.39746	0.565426	0.497186	0.508382	0.535756	0.547328	0.690107	0.513703	0.452717	0.48645	0.48598	0.480387	0.454055	0.424786	0.478018	0.436492	0.425323	0.470003	0.474296	0.422483	0.501048	0.482045	0.374335	0.395598	0.402702	0.348243	0.502678	0.491468	0.587333	0.540152	0.476029	0.555648	0.545262	0.583336	0.513008	0.538639	0.479288	0.53513
48	mmkkkk	0.0351241		0.0324005	0.0299662	0.0507996	0.0670153	0.0618931	0.0300756	0.0399753	0.0558558	0.0149365	0.0111099	0	0	-0.00688563	0.0786193	0.039353	0.0234934	0.0150297	0.0323625	0.0150297	0.0284209	-0.00829918	0.0673655	0.0384299	0.0412696	0.0450121	0.00612263	0.0450121	0.0399753	0.0458468	0	0.0732793	0.0395803	0.0249455	0.0662151	0.0445525	0.0458468	0.0495894	0.0673655	0.0534596	0.026096	-0.0150804	0.0111595	0.0110881	0.0285141	0.0384299	0.0670153
49	mmkkkm	0.0570399		0.028747	0.0509734	-0.0512773	0.0210417	-0.443458	0.136019	0.0587759	0.0839099	0.0123698	0.000250782	0.018738	0.0709878	-0.0355424	0.0376454	0.085076	0.0956249	0.133625	0.0873383	0.0142776	0.183592	0.0654052	0.120226	-0.00530967	0.0929542	0.0377993	0.0972625	0.048832	0.0532455	0.126796	0.075958	0.00945535	0.0370922	0.0444063	0.0565373	0.0911285	0.00545435	0.146463	0.149172	0.0532174	0.0558188	0.0572426	0.0109243	0.166654	0.0622072	0.1366	0.124973
50	mmkkmk	0.0452301		0.0480763	0.0480763	0.197576	0.0766179	0.0864898	0.119145	0.0342066	0.0329064	0.0326076	0.0439381	0.0287682	0.0287682	0.0517799	0.0939096	0.0491435	0.0294475	0.0471839	0.0290395	0.0290395	0.0433171	0.0183184	0.0151699	0.0290395	0.103349	0.0294475	0.0342066	0.0333143	0.0471839	0.0190367	0.0471839	0.0619394	0.0294475	0.0471839	0	0.0329064	0.0290395	0.0290395	0.0623538	0.0138696	0.0342066	0.0151699	0.0480763	0.0433171	0.0433171	0.0433171	0.0142776
51	mmkkmm	0.163786		0.39489	0.262478	0.12365	0.856803	0.0328566	0.173593	0.111438	0.228306	0.184676	0.431845	0.182561	0.142502	0.50244	0.172736	0.340338	0.222457	0.189232	0.162773	0.267254	0.174898	0.0406387	-0.74902	0.254154	0.225387	-0.177618	0.180555	-0.180094	0.350831	0.214654	0.191028	0.125713	0.0325161	0.364423	-0.108475	-0.577528	0.209923	0.222218	-0.105478	0.0234503	0.154475	0.176002	0.133317	0.218388	0.281737	0.3354	0.402419
52	mmkmkk	0.0357714		-0.970017	0.473713	0.101999	0.101254	-0.0314358	-0.116487	-0.516627	0.0148719	0.140774	0.0761896	0.449533	-0.121275	-0.127464	0.472614	0.291826	-0.435866	0.378563	0.107381	0.191508	0.103918	0.50727	-0.0315342	-0.0139216	-0.512876	0.142524	0.266989	0.0888485	0.207559	-0.386423	0.95069	0.134682	0.172555	-0.4283	-0.454678	-0.457547	-0.117899	0.252175	-0.0953845	-0.0149054	0.0381549	0.0296582	0.0441462	0.178014	-0.0928387	0.491287	0.570885
53	mmkmkm	0.119654		0.108257	0.131476	0.280646	0.146886	-0.0139456	0.0675714	0.130346	0.0801091	0.0741346	1.04118	0.0612244	0.251379	0.070721	0.20702	0.0330324	0.127152	0.126938	0.169701	0.0383822	0.158933	-0.0265847	-0.0967865	0.090722	0.0883873	0.136441	0.144361	0.0961814	-0.424508	0.240993	0.0771715	0.074219	0.0938573	0.116731	0.113523	0.13546	0.152029	0.134141	0.11305	0.0570522	0.057833	0.08435	0.099453	0.166069	0.0370293	0.121825	0.148737
54	mmkmmk	0.419535		0.418166	0.827354	0.0822066	0.128695	0.247821	0.29204	0.361914	0.252394	0.464141	0.236194	0.414587	0.755264	0.307436	0.142256	0.991042	0.486012	1.78187	-0.390431	0.181809	0.641456	0.233288	0.60978	0.777928	0.523527	0.605074	0.529652	0.626277	1.12904	0.436836	0.462755	0.313537	-0.246694	0.295028	0.358371	0.637739	-0.488998	0.473269	0.409783	0.170058	0.327562	0.209938	0.380034	0.647967	0.825718	-0.346431	0.445007
55	mmkmmm	0.486067		0.320802	0.525446	0.21175	0.345151	0.350639	0.204268	0.350596	0.589428	0.509328	0.44577	0.732084	0.433215	0.542922	0.558565	0.80216	0.938077	-0.127799	0.572895	0.308331	0.627744	0.246171	0.278668	0.633321	0.513082	0.393256	0.59983	0.558645	0.651567	0.480289	0.37834	0.313095	0.709971	0.440126	0.468949	0.374437	0.294004	0.619606	0.322777	0.324454	0.413412	0.31893	0.602664	0.488318	0.7293	0.515068	0.554215
56	mmmkkk	0.0160243		0	0.010553	0.0305261	0.0230001	0.0140706	0.0124471	0.0244332	0.0119861	0.010553	0.0225391	0.010553	0.010553	0.0140706	0.0225391	0.0116973	0.0244332	0	0.0124471	0.0244332	0.0225391	0.0230001	0.0244332	0.0119861	0.0119861	0.010553	0.0349862	0.0244332	0.0119861	0	0.010553	0.0344996	0.010553	0.0124471	0	0.0119861	0.010553	0.010553	0.0244332	0.0124471	0.010553	0.031392	0.0230001	0.0230001	0	0.010553	0.0225391
57	mmmkkm	0.227694		0.48026	0.233366	0.372663	0.185691	0.405175	0.205176	0.256446	0.166514	0.226479	0.316322	-0.600557	0.196851	0.462603	0.331204	0.204392	0.20318	0.141025	0.15547	0.185679	0.133312	0.266978	0.415857	0.281896	0.166022	0.462688	0.222842	0.570435	0.219782	0.20341	-0.638141	0.285979	0.249827	0.270722	0.201604	0.533129	0.221434	0.18438	0.229519	0.0384042	0.233092	0.287846	0.209143	-0.266954	0.380033	0.562249	0.289778
58	mmmkmk	0.529349		0.626753	0.683237	0.433665	0.486955	0.644684	0.435787	0.455804	0.558521	0.492365	0.643985	0.549451	0.55192	0.440258	0.474178	0.59955	0.66816	0.517454	0.442155	0.554067	0.483858	0.597283	0.432589	0.593547	0.529093	0.580093	0.50563	0.447125	0.491401	0.485617	0.542753	0.539085	0.473011	0.475728	0.531086	0.575121	0.465257	0.597911	0.483408	0.478722	0.506333	0.634461	0.464816	0.613719	0.607223	0.638769	0.514147
59	mmmkmm	0.493204		0.511609	0.715608	0.463521	0.42155	0.52114	0.46724	0.43229	0.534879	0.37543	0.592598	0.502346	0.515859	0.504211	0.596115	0.721306	0.510085	0.425256	0.464946	0.41112	0.492975	0.343954	0.394879	0.518754	0.466233	0.479541	0.440975	0.419806	0.388223	0.509342	0.425276	0.441208	0.49284	0.457119	0.503144	0.535063	0.389239	0.552307	0.509009	0.452893	0.544013	0.498225	0.462584	0.603939	0.551643	0.520392	0.503559
60	mmmmkk	0.420129		0.408265	0.499326	0.181699	0.421683	0.376657	0.146561	0.353226	0.560261	0.449995	0.676776	0.571774	0.573519	-0.752298	0.375259	0.490263	0.157214	0.613308	0.391558	0.434422	0.5013	0.158348	0.542708	0.418423	0.75967	0.40779	0.528782	0.451317	0.471984	0.424024	0.641928	0.306086	0.467171	0.358077	0.501869	0.570091	0.455789	0.575817	0.666708	0.173952	0.370877	0.196423	0.462371	0.462109	0.508576	0.604445	0.51872
61	mmmmkm	0.458209		0.439597	0.554922	0.46708	0.391504	0.599868	0.29655	0.308866	0.45853	0.416958	0.539223	0.508366	0.510207	0.461421	0.393657	0.836915	0.346153	0.478827	0.465195	0.378339	0.454791	0.4562	0.413623	0.489671	0.444981	0.388809	0.551731	0.468976	0.354413	0.41927	0.594499	0.426294	0.453992	0.424557	0.365053	0.37629	0.412669	0.436457	0.53357	0.464435	0.463181	0.451195	0.440629	0.460258	0.533151	0.53407	0.531987
62	mmmmmk	0.504016		0.546715	0.612647	0.389799	0.45453	0.522689	0.385317	0.451967	0.440349	0.557107	0.626979	0.48674	0.54379	0.418041	0.44987	0.662691	0.45541	0.567591	0.444319	0.441143	0.5688	0.453449	0.44998	0.509383	0.494516	0.498689	0.499709	0.497602	0.51882	0.542112	0.524856	0.482883	0.615502	0.365605	0.521618	0.427661	0.600212	0.577689	0.498323	0.449336	0.477295	0.487152	0.542195	0.552689	0.564087	0.573539	0.481336
63	mmmmmm	0.498594		0.530566	0.619734	0.532906	0.403276	0.552042	0.392515	0.415042	0.465434	0.512277	0.573844	0.496443	0.456239	0.467973	0.418119	0.735547	0.471722	0.538457	0.454487	0.464638	0.548535	0.476297	0.47356	0.520038	0.547549	0.473448	0.498756	0.441744	0.556832	0.43451	0.529982	0.451977	0.508553	0.412479	0.452109	0.452112	0.543032	0.538835	0.537184	0.494075	0.521449	0.46837	0.496102	0.528749	0.564843	0.567439	0.467926
[truncated: 4 more columns]
